# Supplementary material for: Dual-emission ratio fluorescence for selective and sensitive detection of ferric ions and ascorbic acid based on one-pot synthesis of glutathione protected gold nanoclusters
Source: Royal Society of Chemistry journal article supplement (doi:10.1039/d0ra10281d), 2021-01-01
Supplement: d0ra10281d1.pdf [file d0ra10281d1.pdf]

Dual-emission ratio fluorescence for selective and sensitive  
detection of ferric ion and ascorbic acid based on one-pot synthesis  
of glutathione protected gold nanoclusters

Shuai Zhang<sup>a</sup>, Cong Zhang<sup>a</sup>, Xiaodong Shao<sup>b</sup>, Rentian Guan<sup>a</sup>, Yingying Hu<sup>a</sup>, Keying  
Zhang<sup>a</sup>, Wenjing Liu<sup>a</sup>, Min Hong<sup>a</sup>, Qiaoli Yue<sup>a\*</sup>

<sup>a</sup> Shandong Provincial Key Laboratory of Chemical Energy Storage and Novel Cell  
Technology, School of Chemistry and Chemical Engineering, Liaocheng University

<sup>b</sup> State Key Laboratory for Performance and Structure Safety of Petroleum Tubular  
Goods and Equipment Materials, Tubular Goods Research Institute, Xi'an 710077,

China

Corresponding author:

Dr. Qiaoli Yue

Email, [yueqiaoli@yahoo.com](mailto:yueqiaoli@yahoo.com)

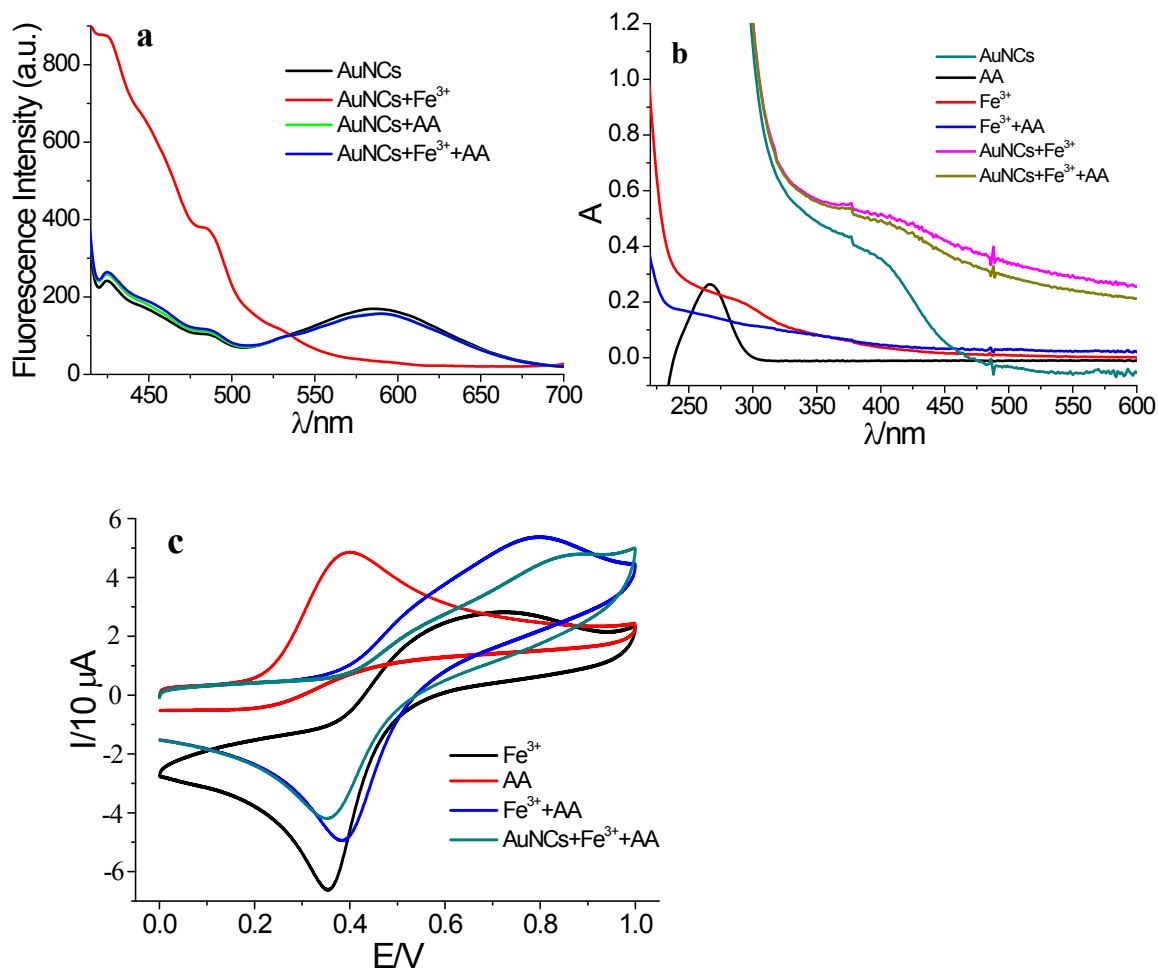

Figure S1 Fluorescence spectra of AuNCs, AuNCs+Fe<sup>3+</sup>, AuNCs +AA, and AuNCs+Fe<sup>3+</sup>+AA

(Ex=390 nm) (a), absorption spectra of AuNCs, Fe<sup>3+</sup>, AA, Fe<sup>3+</sup>+ AA, AuNCs+Fe<sup>3+</sup> and

AuNCs+Fe<sup>3+</sup>+ AA (b), cyclic voltammetry curves of Fe<sup>3+</sup>, AA, Fe<sup>3+</sup>+AA and AuNCs+Fe<sup>3+</sup>+AA

(c). Concentration: AuNCs 0.05 mg mL<sup>-1</sup>, Fe<sup>3+</sup> 0.1 mM, AA 0.05 mM.

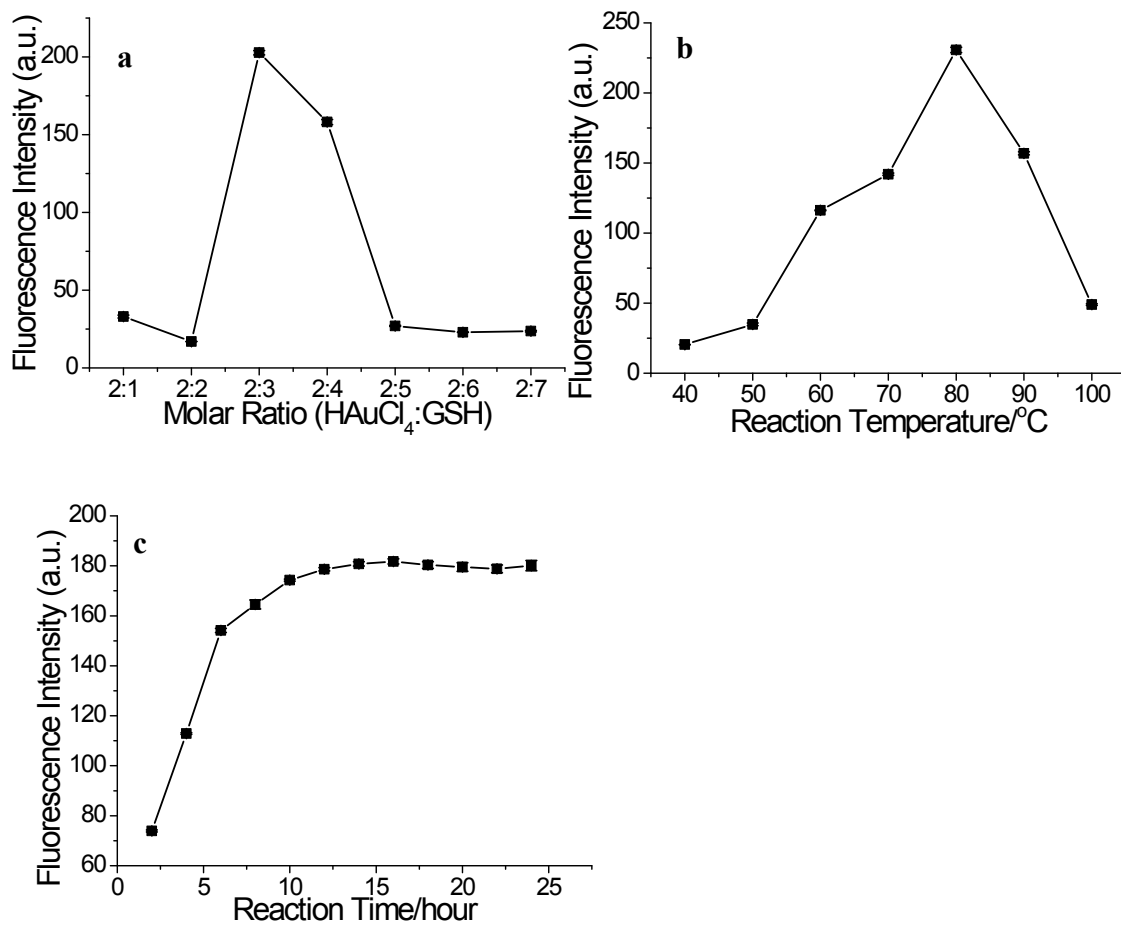

Figure S2 Influence of molar ratio of precursors (a), reaction temperature (b), and time (c) on the fluorescence of AuNCs.

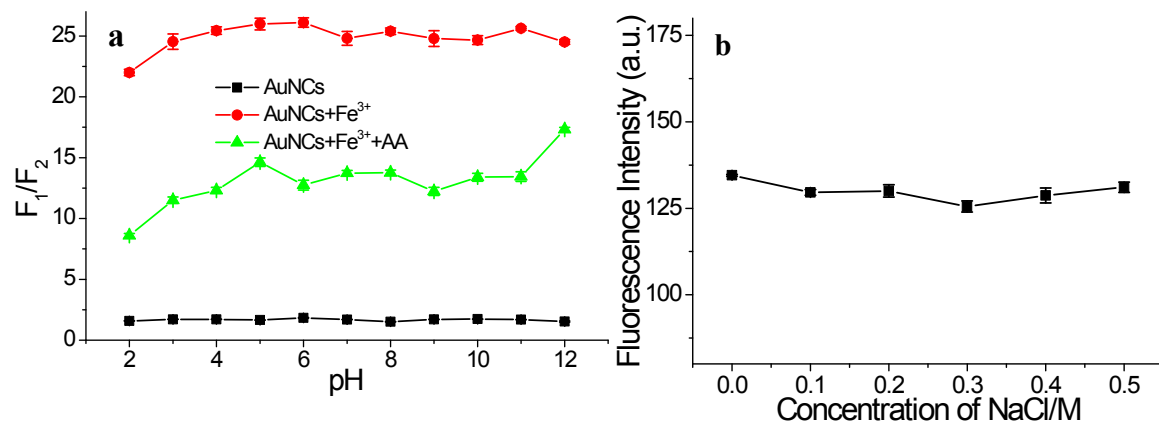

Figure S3 Effect of pH on the fluorescence ratio of AuNCs, AuNCs+Fe<sup>3+</sup>, AuNCs+ Fe<sup>3+</sup>+AA(a), and influence of NaCl concentration on the fluorescence intensity of AuNCs (b).
